# Supplementary material for: EMMPRIN regulates tumor growth and metastasis by recruiting bone marrow-derived cells through paracrine signaling of SDF-1 and VEGF
Source: PubMed Central journal article supplement (PMC4741713; doi:10.18632/oncotarget.5331), 2015-09-22
Supplement: oncotarget-06-32575-s001.pdf [file oncotarget-06-32575-s001.pdf]

## SUPPLEMENTARY FIGURES AND TABLES

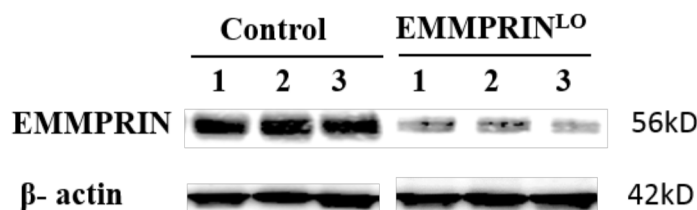

**Supplementary Figure S1: Western Blot analysis of EMMPRIN expression in tumor tissues.** Three representative tumors from each group were isolated from mice and subjected to Western Blot as described in Materials and Methods.

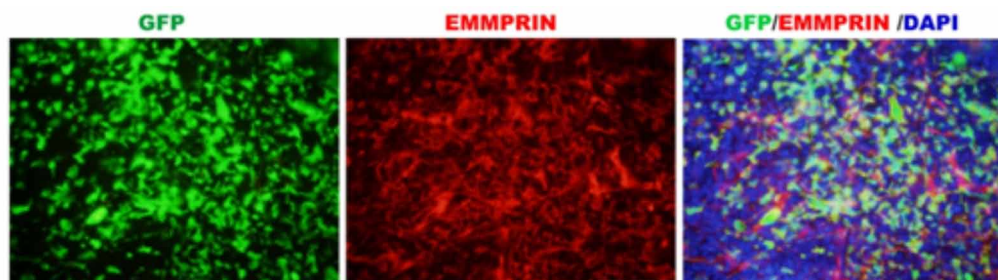

**Supplementary Figure S2: Immunofluorescence images of tumor sections stained with anti-EMMPRIN antibody.** Green and red represent BMDCs and EMMPRIN<sup>+</sup> cells, respectively. As shown in these images, EMMPRIN expression (red) is colocalized with BMDCs (green), resulting in yellow signals.

**Supplementary Table S1: Proteins and their signals detected by the RayBio<sup>®</sup> arrays.** Only those proteins with over 2 fold change, either greater or smaller, are listed.

| Protein                | LLC-Control | LLC-EMMPRIN <sup>Lo</sup> | LLC-EMMPRIN <sup>Lo</sup> / LLC-Control |
|------------------------|-------------|---------------------------|-----------------------------------------|
| Adiponectin / Acrp30   | 69.77       | 246.12                    | 3.53                                    |
| Artemin                | 35.01       | 123.31                    | 3.52                                    |
| Axl                    | 1           | 119.17                    | 119.17                                  |
| Chordin-Like 2         | 37.65       | 133.68                    | 3.55                                    |
| Coagulation Factor III | 28.41       | 128.5                     | 4.52                                    |
| CTACK                  | 160.85      | 79.28                     | 0.49                                    |
| CTLA-4 /CD152          | 112.01      | 253.89                    | 2.27                                    |
| CXCL16                 | 649.69      | 1737.84                   | 2.67                                    |
| CXCR2 / IL-8 RB        | 60.53       | 11.4                      | 0.19                                    |
| DAN                    | 36.77       | 1.18                      | 0.03                                    |
| Dkk-1                  | 4709.13     | 1261.67                   | 0.27                                    |
| Dkk-4                  | 1           | 14.51                     | 14.51                                   |
| EGF R                  | 100.57      | 21.76                     | 0.22                                    |
| Eotaxin / CCL11        | 1           | 129.54                    | 129.54                                  |

(Continued)

| Protein                   | LLC-Control | LLC-EMMPRIN <sup>Lo</sup> | LLC-EMMPRIN <sup>Lo</sup> / LLC-Control |
|---------------------------|-------------|---------------------------|-----------------------------------------|
| FGF-21                    | 1           | 54.4                      | 54.4                                    |
| Flt-3 Ligand              | 8.17        | 1.18                      | 0.14                                    |
| Frizzled-1                | 14.77       | 1.18                      | 0.08                                    |
| Frizzled-7                | 56.57       | 166.84                    | 2.95                                    |
| GDF1                      | 15.21       | 1.18                      | 0.08                                    |
| GITR / TNFRF18            | 133.13      | 6.73                      | 0.05                                    |
| ICAM-2                    | 26.65       | 1.18                      | 0.04                                    |
| ICAM-5                    | 108.05      | 1.18                      | 0.01                                    |
| IGFBP-1                   | 410.77      | 1470.48                   | 3.58                                    |
| IGFBP-rp1 /<br>IGFBP-7    | 6091.17     | 486.53                    | 0.08                                    |
| IL-1 RI                   | 179.77      | 16.58                     | 0.09                                    |
| IL-1 RII                  | 71.09       | 1.18                      | 0.02                                    |
| IL-2 R alpha              | 75.93       | 1.18                      | 0.02                                    |
| IL-2 R beta               | 15.88       | 1.18                      | 0.07                                    |
| IL-6 R                    | 178.45      | 72.54                     | 0.41                                    |
| IL-9                      | 95.29       | 15.54                     | 0.16                                    |
| IL-10 R alpha             | 100.57      | 1.18                      | 0.01                                    |
| IL-10 R beta              | 15.21       | 1.18                      | 0.08                                    |
| IL-12 p40                 | 112.45      | 1.18                      | 0.01                                    |
| IL-12 p70                 | 20164       | 235.75                    | 0.01                                    |
| IL-17                     | 61.41       | 1.18                      | 0.02                                    |
| IL-17D                    | 170.97      | 1.18                      | 0.01                                    |
| IL-18 R alpha /IL-1<br>R5 | 17.41       | 1.18                      | 0.07                                    |
| IL-20                     | 112.01      | 32.64                     | 0.29                                    |
| IL-20 R alpha             | 138.85      | 47.67                     | 0.34                                    |
| IL-22 BP                  | 63.17       | 1.18                      | 0.02                                    |
| IL-28                     | 27.97       | 72.02                     | 2.58                                    |
| I-TAC / CXCL11            | 117.73      | 23.83                     | 0.2                                     |
| Kremen-1                  | 77.25       | 33.16                     | 0.43                                    |
| LRP-6                     | 86.05       | 23.83                     | 0.28                                    |
| L-Selectin (CD62L)        | 73.29       | 27.46                     | 0.37                                    |
| MFG-E8                    | 44.69       | 1.18                      | 0.03                                    |
| MIP 2                     | 625.93      | 7043.59                   | 11.25                                   |
| MMP-2                     | 71.6        | 23.92                     | 0.33                                    |
| MMP-3                     | 50.41       | 1.18                      | 0.02                                    |

(Continued)

| Protein                | LLC-Control | LLC-EMMPRIN <sup>Lo</sup> | LLC-EMMPRIN <sup>Lo</sup> / LLC-Control |
|------------------------|-------------|---------------------------|-----------------------------------------|
| MMP-9                  | 2.57        | 1.18                      | 0.46                                    |
| Neurturin              | 50.41       | 1.18                      | 0.02                                    |
| NOV / CCN3             | 31.49       | 1.18                      | 0.04                                    |
| Osteoactivin / GPNMB   | 64.05       | 1.18                      | 0.02                                    |
| Osteocrin              | 28.41       | 1.18                      | 0.04                                    |
| Prolactin              | 78.13       | 178.75                    | 2.29                                    |
| SCF                    | 126.09      | 22.28                     | 0.18                                    |
| SDF-1 / CXCL12         | 35.8        | 11.29                     | 0.32                                    |
| SIGIRR                 | 57.89       | 1.18                      | 0.02                                    |
| SLPI                   | 935.25      | 2100.02                   | 2.25                                    |
| Spinesin               | 18.29       | 1.18                      | 0.06                                    |
| TCCR / WSX-1           | 7.73        | 1.18                      | 0.15                                    |
| TECK / CCL25           | 5.97        | 1.18                      | 0.2                                     |
| TGF-beta RI / ALK-5    | 386.57      | 31164                     | 80.62                                   |
| TIMP-1                 | 56.13       | 19.18                     | 0.34                                    |
| TMEFF1 / Tomoregulin-1 | 47.77       | 1.18                      | 0.02                                    |
| TNF RI / TNFRSF1A      | 24.01       | 1.18                      | 0.05                                    |
| TREM-1                 | 84.29       | 1.18                      | 0.01                                    |
| Ubiquitin              | 126.97      | 53.37                     | 0.42                                    |
| uPAR                   | 64.49       | 1.18                      | 0.02                                    |
| VE-Cadherin            | 13.45       | 1.18                      | 0.09                                    |
| VEGF-D                 | 37.65       | 1.18                      | 0.03                                    |
| WISP-1 / CCN4          | 5.97        | 1.18                      | 0.2                                     |

**Supplementary Table S2: Sequences of siRNA used in the study**

| Target gene       | Sequences                                                       |
|-------------------|-----------------------------------------------------------------|
| Mouse EMMPRIN-1   | 5'-CGUAGAUUCCCAUCAUACAdTdT-3';<br>5'-UGUAUGAUGGGAAUCUACGdGdG-3' |
| Mouse EMMPRIN-2   | 5'GGAUACAGGUCGGAAAGAAdTdT-3'<br>5'UUCUUUCCGACCUUGAUCCdTdG-3'    |
| Mouse EMMPRIN-3   | 5'-GAGGCAAUCACCAAUAGCAdTdT-3'<br>5'-UGCUAUUGGUGAUUGCCUCdTdT-3'  |
| Human EMMPRIN     | 5'-GUUCUUCGUGAGUUCUCdTdT-3'<br>5'GAGGAACUCACGAAGAACdTdT-3'      |
| Scrambled Control | 5'-GAAGCAGCACGACUUCUUCdTdT-3'<br>5'-GAAGAAGUCGUGCUGCUUCdTdT-3'  |

**Supplementary Table S3: Sequences of primer used in the study**

| Target gene   | Sequences                                                           |
|---------------|---------------------------------------------------------------------|
| Mouse EMMPRIN | 5'-CCGGCCAGAAAACGGACTT-3';<br>5'-AGGAAGACGCAGGAGTACTCT-3'           |
| Mouse SDF-1   | 5'-GAAGTGGAGCCATAGTAATGCC-3'<br>5'-TCCAAGTGGAAAAATACACCG-3'         |
| Mouse VEGF    | 5'-TGGATGTCTACCAGCGAAGC-3'<br>5'-ACAAGGCTCACAGTGATTTT-3'            |
| Mouse GAPDH   | 5'-GCCAAGGTCATCCATGACAAC TTTGG-3'<br>5'GCCTGCTTACCACCTTCTTGATGTC-3' |
| Human EMMPRIN | 5'-TCGCGCTGCTGGGCACC-3'<br>5'-TGGCGCTGTCATTCAAGGA-3'                |
| Human SDF-1   | 5'-AGTCAGGTGGTGGCTTAACAG-3'<br>5'-AGAGGAGGTGAAGGCAGTGG-3'           |
| Human VEGF    | 5'-CTCACCGCCTCGGCTTGTCACA-3'<br>5'-CCTGGTGGACATCTTCCAGGAGTA-3'      |
| Human GAPDH   | 5'-GGTGGTCTCCTCTGACTTCAACA-3'<br>5'-GTTGCTGTAGCCAAATTCGTTGT-3'      |
